# Supplementary material for: ATG7-enhanced impaired autophagy exacerbates acute pancreatitis by promoting regulated necrosis via the miR-30b-5p/CAMKII pathway
Source: PubMed Central journal article supplement (PMC8901675; doi:10.1038/s41419-022-04657-4), 2022-03-07
Supplement: 41419_2022_4657_MOESM2_ESM.pdf [file 41419_2022_4657_MOESM2_ESM.pdf]

Supplementary Figure 1

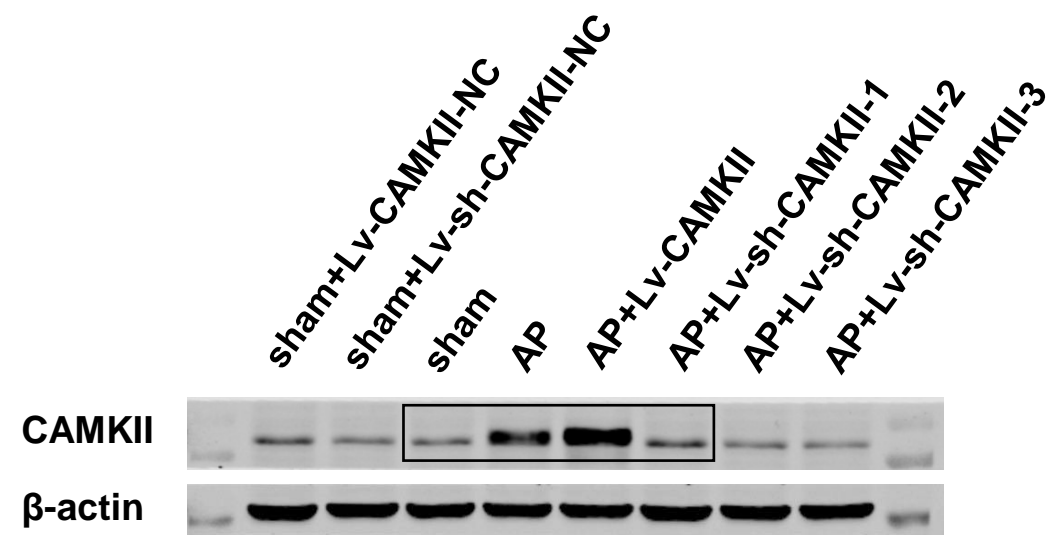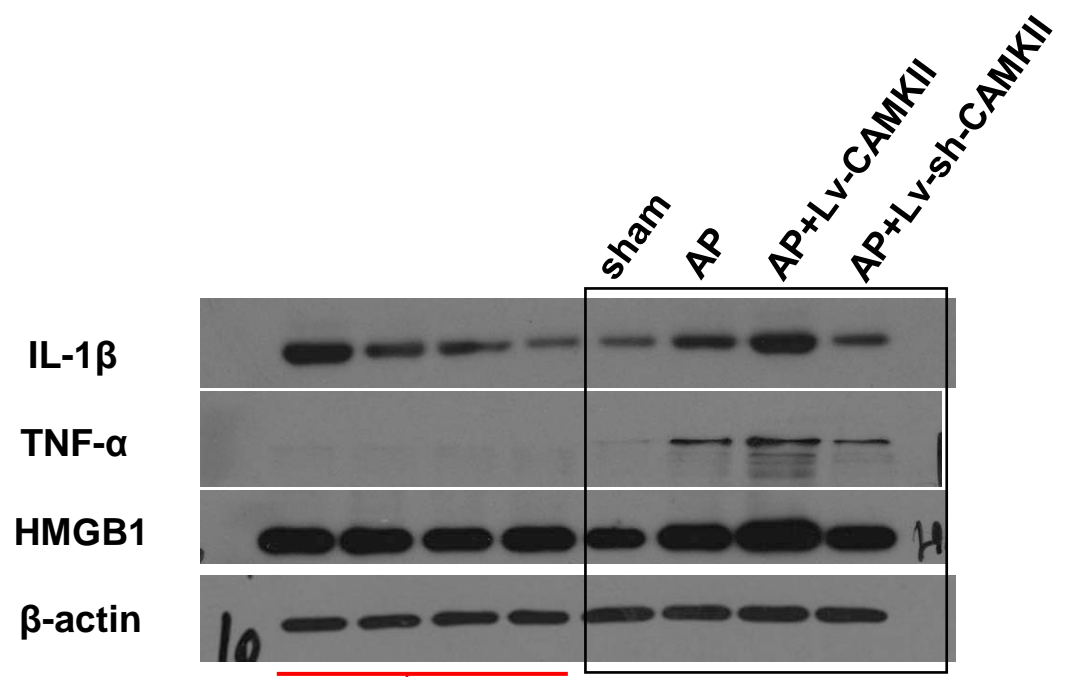

Experiments and blots do not involved in the present study

Supplementary Figure 2

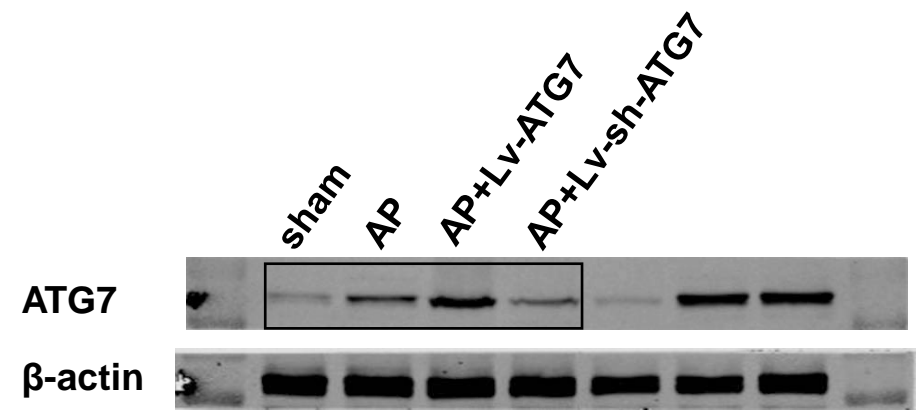

Experiments and blots do not involved in the present study

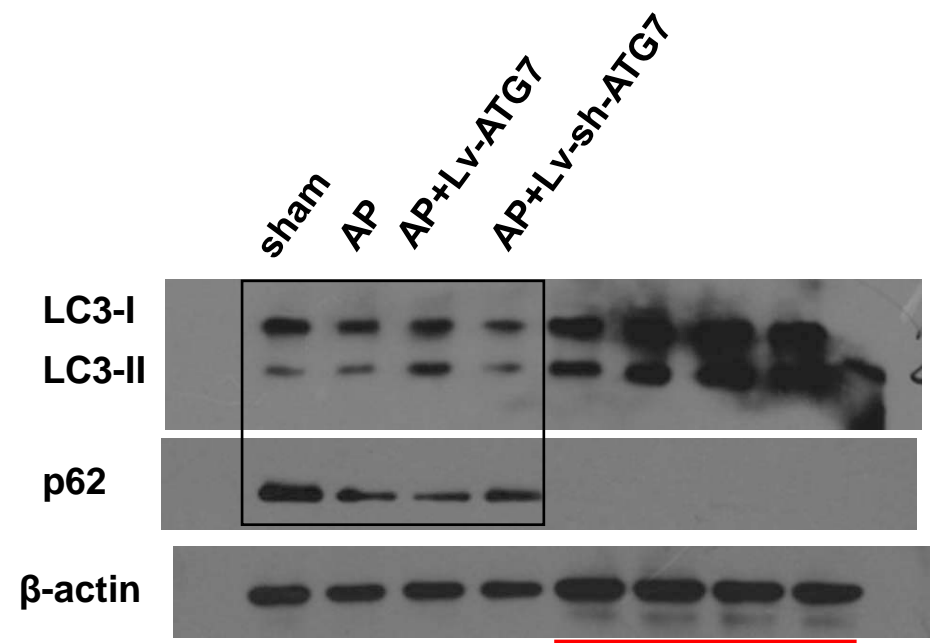

Protein sample overload

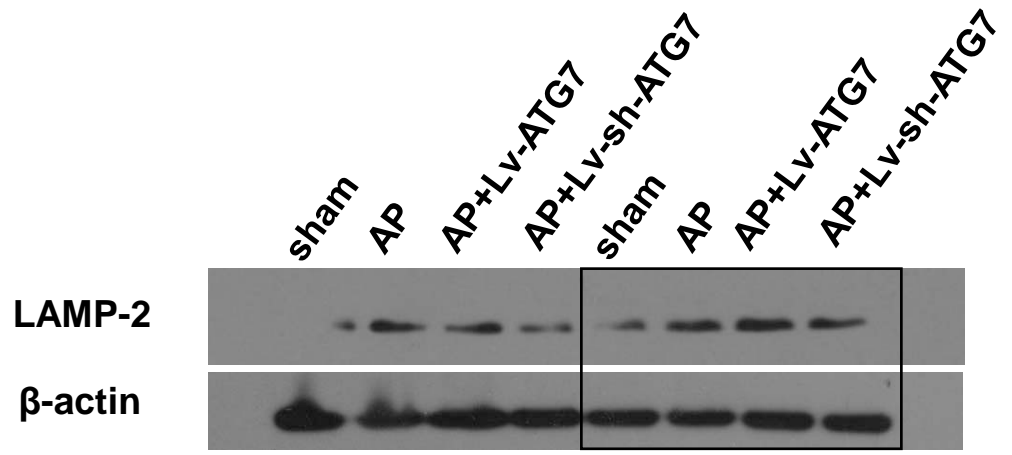

Supplementary Figure 3

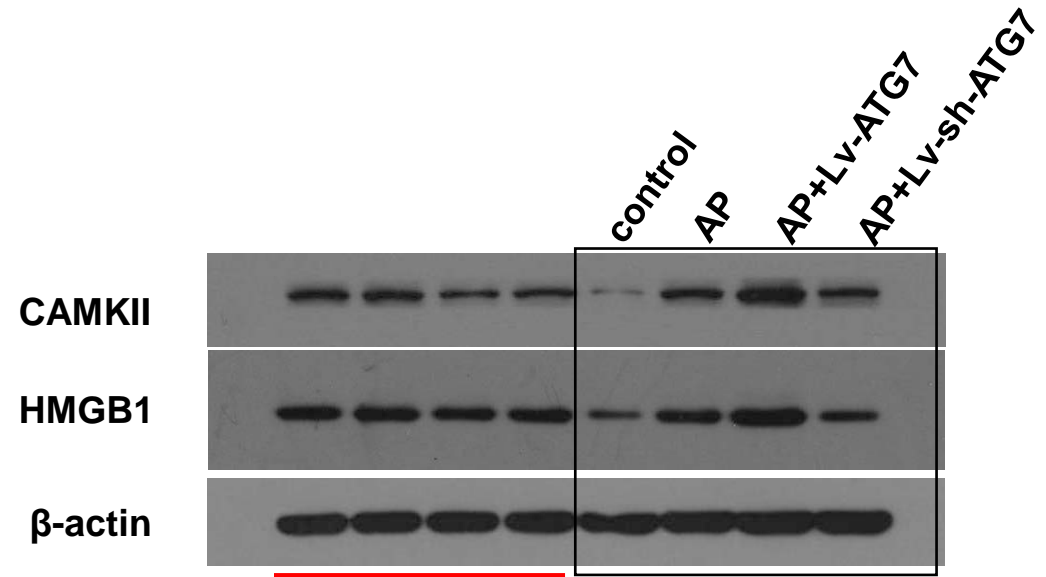

Experiments and blots do not  
involved in the present study

Supplementary Figure 4

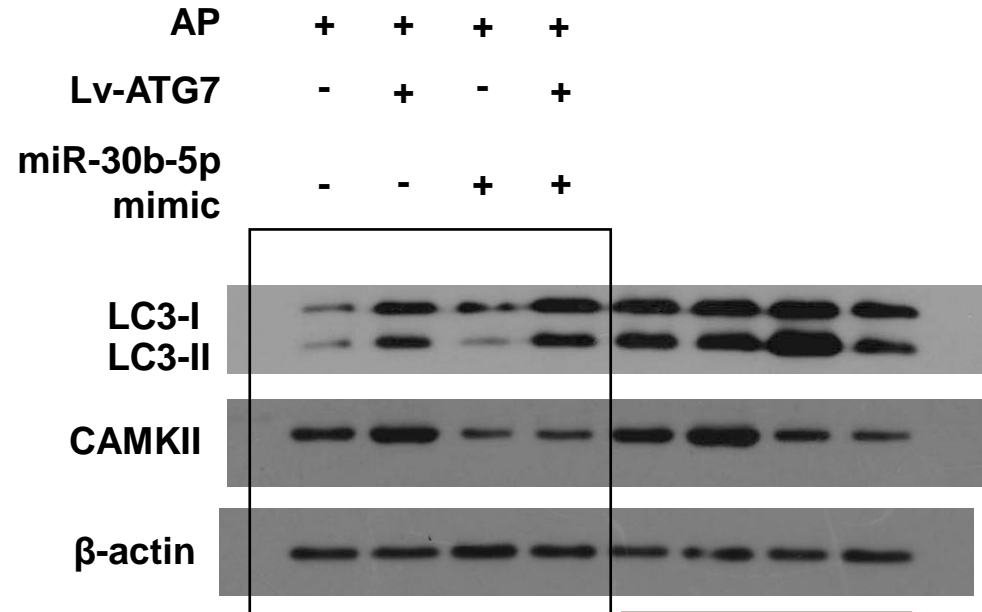

Experiments and blots do not  
involved in the present study

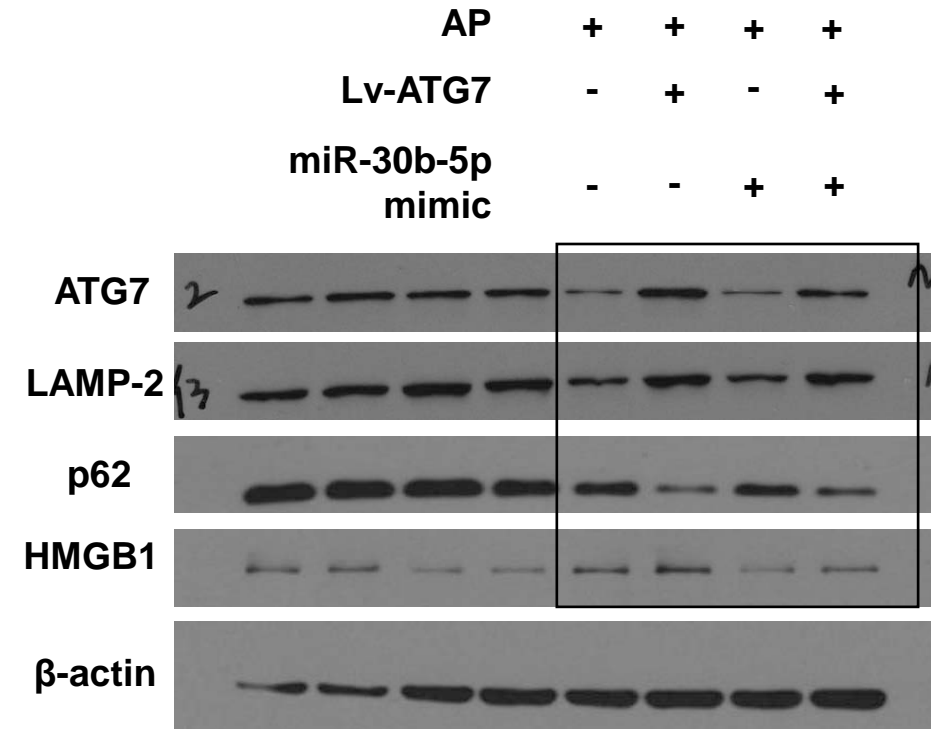

Experiments and blots do not  
involved in the present study
